# Supplementary material for: Excited State Proton Transfers in Hybrid Compound Based on Indoline Spiropyran of the Coumarin Type and Azomethinocoumarin in the Presence of Metal Ions
Source: MDPI journal article supplement (doi:10.3390/molecules26226894), 2021-11-16
Supplement: s1 [file s1]

## Supplementary materials

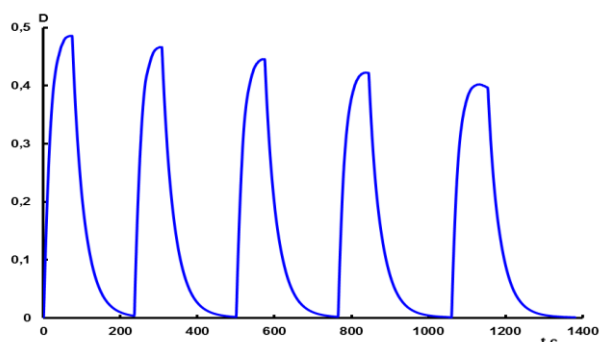

**Figure S1.** Kinetics of photo-coloring through a UFS-1 colored glass filter (235-400 nm) and dark relaxation of a solution of compound **2** in a mixture of toluene : acetonitrile solvents at the wavelength of 590 nm.

**Table S1.** Spectral characteristics of spiropyran **2** and its complexes with metal ions in mixed solvent with the ratio  $C_L/C_{Me} = 1/100$

| Ion              | $\lambda_A^{max}$ , nm ( $D_A^{max}$ ) | $\lambda_B^{max}$ , nm | $\Delta D_B^{phot}$ | $\pm \Delta \lambda_B$ , nm |
|------------------|----------------------------------------|------------------------|---------------------|-----------------------------|
| -                | 332 (0.49), 345 (0.44)                 | 405sh,<br>590          | 0,48                | -                           |
| Li <sup>+</sup>  | 332 (0.49), 345 (0.44)                 | 405<br>560             | 0,17                | -30                         |
| Ca <sup>2+</sup> | 332 (0.49), 345 (0.44)                 | 405sh<br>540           | 0,02<br>0,01        | -<br>-50                    |
| Zn <sup>2+</sup> | 332 (0.59), 345 (0.53)                 | 405<br>545             | 0,03<br><0.01       | -<br>-45                    |
| Mg <sup>2+</sup> | 332 (0.50), 345 (0.45)                 | 405<br>535             | 0,02<br><0,01       | -<br>-55                    |

Note:  $\lambda_A^{max}$  and  $\lambda_B^{max}$  are the wavelengths of the maxima of the absorption bands of the initial and UV induced (in the visible spectra region) forms A and B, respectively;  $D_A^{max}$  – the optical density in the maximum of absorption band of initial form A,  $\Delta D_B^{phot}$  – change in the optical density in the maximum of absorption band located in the visible region of the spectrum of photoinduced form B;  $\pm \Delta \lambda_B$  – shift of the absorption band maximum of the photoinduced form B of spiropyran in the presence of metal ions relative to the solution

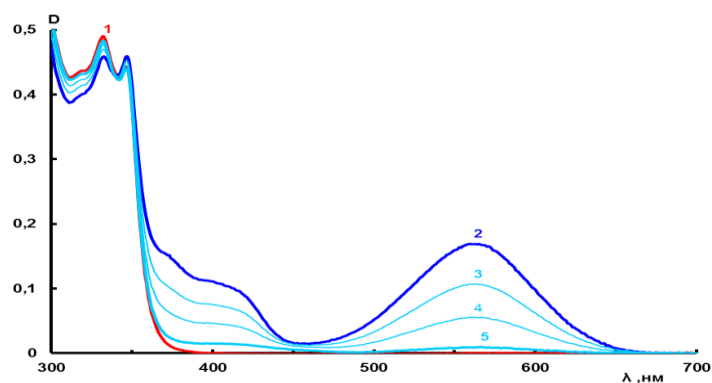

**Figure S2.** Absorption spectra of compound **2** in a mixture of toluene : acetonitrile solvents in the presence of  $\text{Li}^+$  ions in a solution ( $C_L/C_{\text{Me}} = 1/100$ ) before (1), after UV - irradiation and subsequent dark relaxation (3-5).

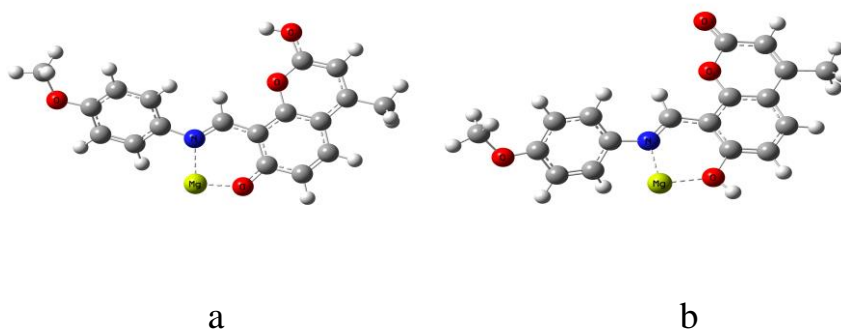

**Figure S3 .** Optimized models of tautomeric T (a) and E (b) forms of azomethinocoumarin complexes with  $\text{Mg}^{2+}$  ions.

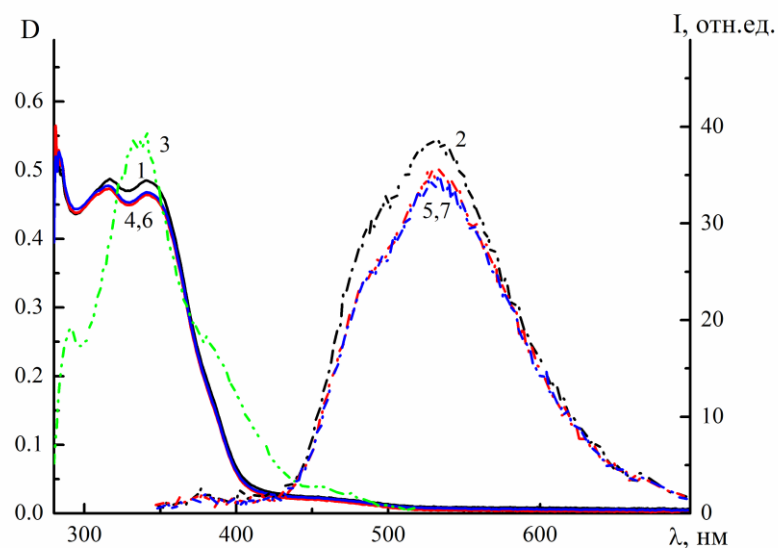

**Figure S4.** Absorption spectra (1, 4, 6), fluorescence excitation spectra at  $\lambda_{\text{reg}} = 530$  nm (3) and fluorescence at  $\lambda_{\text{ex}} = 338$  nm (2, 5, 7) of compound **3** with  $\text{Zn}^{2+}$  ions in a mixture of toluene-acetonitrile solvents before (1-3) and after irradiation by UV (4, 5) and visible light (6, 7).

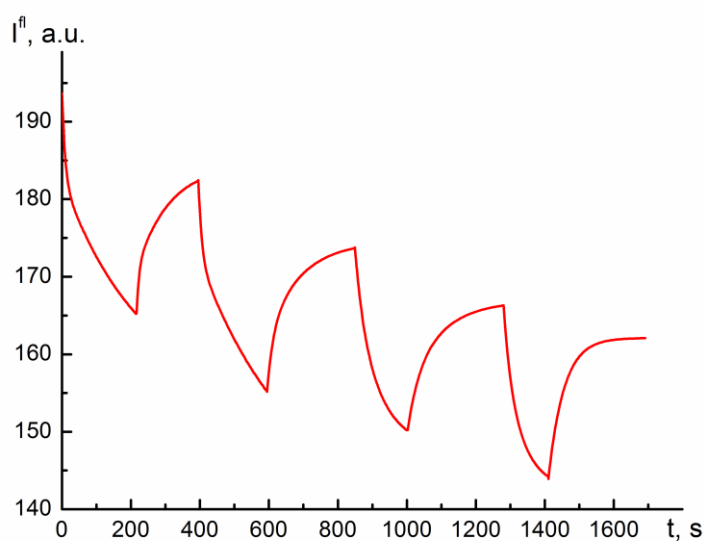

**Figure S5.** Kinetics of fluorescence changes for **1** in a toluene solution at a wavelength of 545 nm (at  $\lambda_{\text{ex}} = 395$  nm) during alternating irradiation with UV (down) and visible (up) light from an external source of high intensity

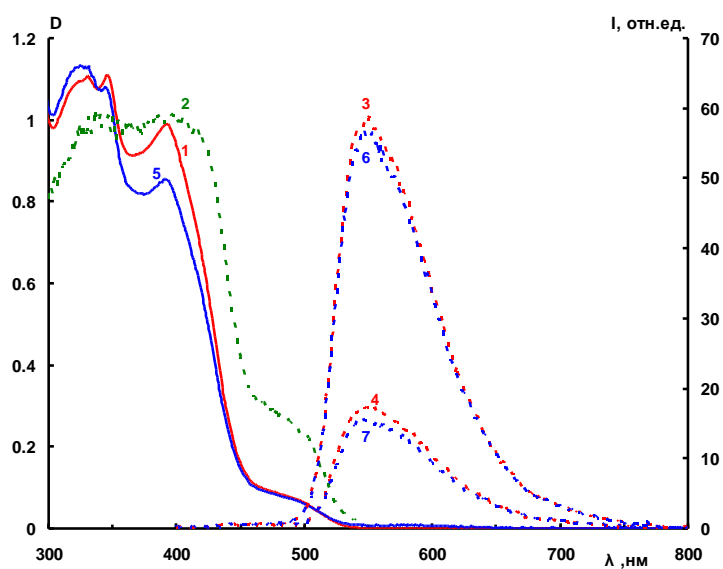

**Figure S6.** Absorption spectra (1,5), fluorescence excitation spectra at  $\lambda_{\text{reg}} = 550$  nm (2) and fluorescence at  $\lambda_{\text{ex}} = 390$  nm (3,6) and 490 nm (4, 7) before (1-4) and after UV irradiation (5-8) of compound **1** with  $\text{Li}^+$  ions in the mixed toluene : acetonitrile solution

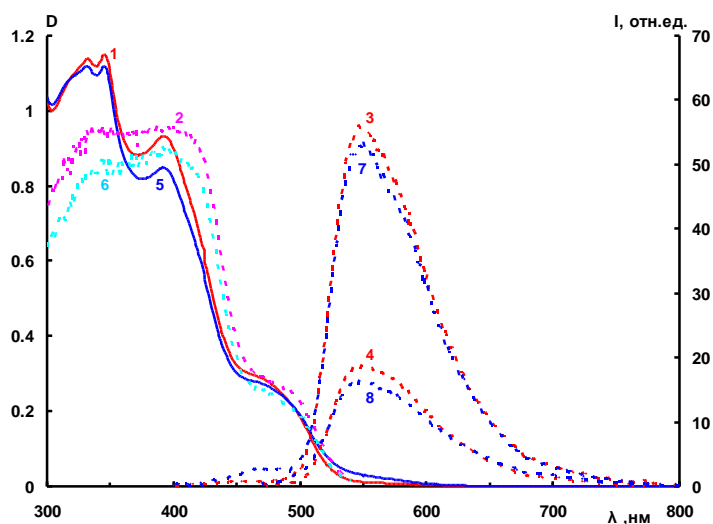

**Figure S7.** Absorption spectra (1,5), fluorescence excitation spectra at  $\lambda_{\text{reg}} = 545$  nm (2, 6) ) and fluorescence at  $\lambda_{\text{ex}} = 390$  nm (3, 7) and 460 nm (4, 8) before (1,4) and after UV- irradiation of compound **1** with  $\text{Ca}^{2+}$  ions in the mixed toluene : acetonitrile solution.

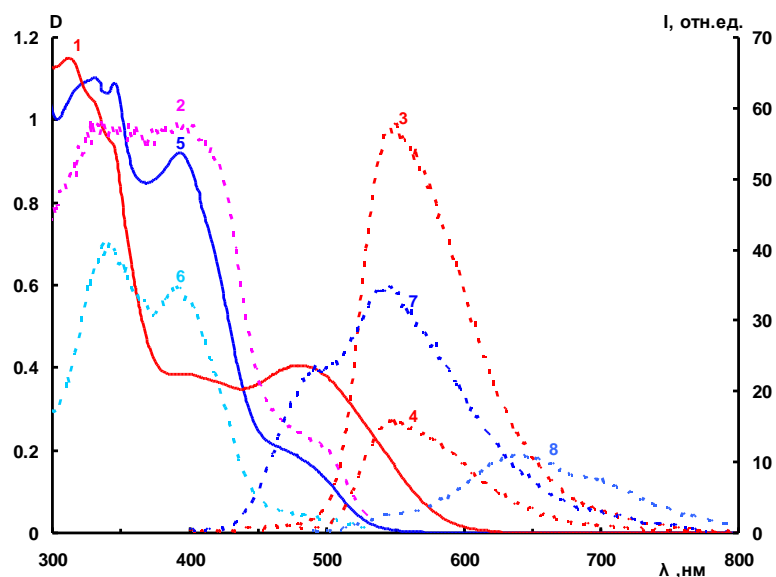

**Figure S8.** Absorption spectra (1,5), fluorescence excitation spectra at  $\lambda_{\text{reg}} = 545$  nm (2, 6) and fluorescence at  $\lambda_{\text{ex}} = 390$  nm (3,7) and 480 nm (4,8) before (1-4) and after UV – irradiation compound **1** with  $\text{Zn}^{2+}$  ions in the mixed toluene : acetonitrile solution.

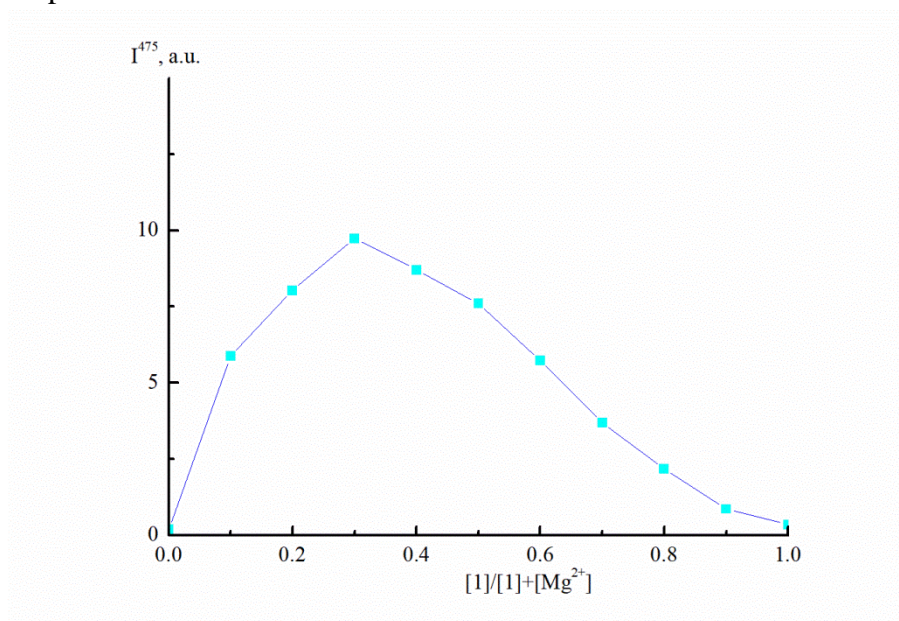

**Figure S9.** The changes in the fluorescence emission spectra at 475 nm of compound **1** at  $\text{Mg}^{2+}$  addition.
